# Supplementary material for: Influence of the Carbon and Nitrogen Sources on Diabolican Production by the Marine Vibrio diabolicus Strain CNCM I-1629
Source: MDPI journal article supplement (doi:10.3390/polym14101994), 2022-05-13
Supplement: s1 [file s1]

**Supplementary data S2 : Statistics from the CCD analyses with Statgraphics software**  
**(ANOVA table, Model coefficients, Residual plot and Optimum value)**

**Ammonium acetate - Glucose : Growth rate ( $\mu_{\max}$ , min<sup>-1</sup>)**

**Analysis of Variance**

| Source                         | Sum of Squares | Df | Mean Square  | F-Ratio | P-Value |
|--------------------------------|----------------|----|--------------|---------|---------|
| A:Ammonium acetate (mM)        | 0.000303606    | 1  | 0.000303606  | 500.36  | 0.0000  |
| B:Glucose (g L <sup>-1</sup> ) | 0.0000440626   | 1  | 0.0000440626 | 72.62   | 0.0004  |
| AA                             | 1.52104E-7     | 1  | 1.52104E-7   | 0.25    | 0.6379  |
| AB                             | 5.57172E-10    | 1  | 5.57172E-10  | 0.00    | 0.9770  |
| BB                             | 4.24029E-8     | 1  | 4.24029E-8   | 0.07    | 0.8021  |
| Total error                    | 0.0000030339   | 5  | 6.0678E-7    |         |         |
| Total (corr.)                  | 0.000350864    | 10 |              |         |         |

R-squared = 99.1353 percent

R-squared (adjusted for d.f.) = 98.2706 percent

Standard Error of Est. = 0.000778961

Mean absolute error = 0.000440966

Durbin-Watson statistic = 1.29846 (P=0.3557)

Lag 1 residual autocorrelation = 0.271903

**Regression coeffs**

| Coefficient                    | Estimate     |
|--------------------------------|--------------|
| constant                       | 0.0366905    |
| A:Ammonium acetate (mM)        | -0.000166811 |
| B:Glucose (g L <sup>-1</sup> ) | -0.00011793  |
| AA                             | 1.02574E-7   |
| AB                             | 1.31136E-8   |
| BB                             | 1.71168E-7   |

**Residual plot**

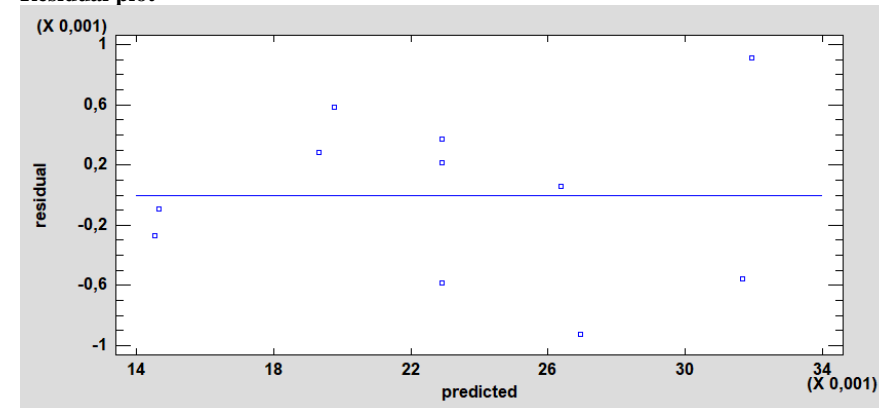

**Optimum  $\mu$  value = 0.0354 min<sup>-1</sup> for 3.4 mM ammonium acetate and 5.7 g L<sup>-1</sup> glucose**

## Ammonium acetate - Mannitol : Growth rate ( $\mu_{\max}$ , min<sup>-1</sup>)

### Analysis of Variance

| Source                          | Sum of Squares | Df | Mean Square | F-Ratio | P-Value |
|---------------------------------|----------------|----|-------------|---------|---------|
| A:Ammonium acetate (mM)         | 0.000323682    | 1  | 0.000323682 | 736.41  | 0.0000  |
| B:Mannitol (g L <sup>-1</sup> ) | 8.54021E-7     | 1  | 8.54021E-7  | 1.94    | 0.2221  |
| AA                              | 4.15457E-8     | 1  | 4.15457E-8  | 0.09    | 0.7709  |
| AB                              | 1.62369E-7     | 1  | 1.62369E-7  | 0.37    | 0.5699  |
| BB                              | 5.39568E-7     | 1  | 5.39568E-7  | 1.23    | 0.3183  |
| Total error                     | 0.00000219771  | 5  | 4.39543E-7  |         |         |
| Total (corr.)                   | 0.000327629    | 10 |             |         |         |

R-squared = 99.3292 percent

R-squared (adjusted for d.f.) = 98.6584 percent

Standard Error of Est. = 0.00066298

Mean absolute error = 0.000421463

Durbin-Watson statistic = 0.988954 (P=0.1595)

Lag 1 residual autocorrelation = 0.393357

### Regression coeffs

| Coefficient                     | Estimate     |
|---------------------------------|--------------|
| constant                        | 0.0373466    |
| A:Ammonium acetate (mM)         | -0.000160983 |
| B:Mannitol (g L <sup>-1</sup> ) | -0.000073747 |
| AA                              | -5.36079E-8  |
| AB                              | 2.23861E-7   |
| BB                              | 6.10587E-7   |

### Residual plot

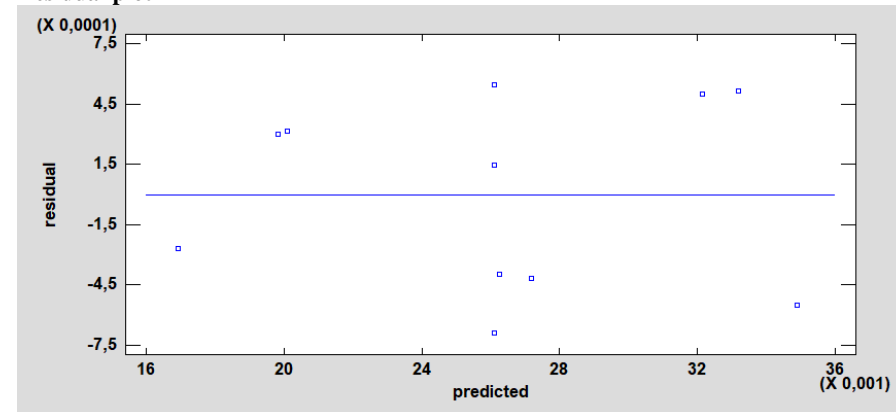

Optimum  $\mu$  value = 0.0364 min<sup>-1</sup> for 3.4 mM ammonium acetate and 5.7 g L<sup>-1</sup> mannitol

## Ammonium acetate - Glucose : Molecular Weight (MW, g L<sup>-1</sup>)

### Analysis of Variance

| Source                         | Sum of Squares | Df | Mean Square | F-Ratio | P-Value |
|--------------------------------|----------------|----|-------------|---------|---------|
| A:Ammonium acetate (mM)        | 4.35019E10     | 1  | 4.35019E10  | 0.57    | 0.4833  |
| B:Glucose (g L <sup>-1</sup> ) | 6.09512E11     | 1  | 6.09512E11  | 8.02    | 0.0366  |
| AA                             | 1.06442E9      | 1  | 1.06442E9   | 0.01    | 0.9104  |
| AB                             | 2.1025E10      | 1  | 2.1025E10   | 0.28    | 0.6213  |
| BB                             | 2.06554E10     | 1  | 2.06554E10  | 0.27    | 0.6243  |
| Total error                    | 3.79828E11     | 5  | 7.59656E10  |         |         |
| Total (corr.)                  | 1.07462E12     | 10 |             |         |         |

R-squared = 64.6548 percent

R-squared (adjusted for d.f.) = 29.3096 percent

Standard Error of Est. = 275619.

Mean absolute error = 145621.

Durbin-Watson statistic = 0.909832 (P=0.1209)

Lag 1 residual autocorrelation = 0.218778

### Regression coeffs.

| Coefficient                    | Estimate  |
|--------------------------------|-----------|
| constant                       | 1.66527E6 |
| A:Ammonium acetate (mM)        | -3834.67  |
| B:Glucose (g L <sup>-1</sup> ) | 16394.3   |
| AA                             | -8.58073  |
| AB                             | 80.5556   |
| BB                             | -119.465  |

### Residual plot

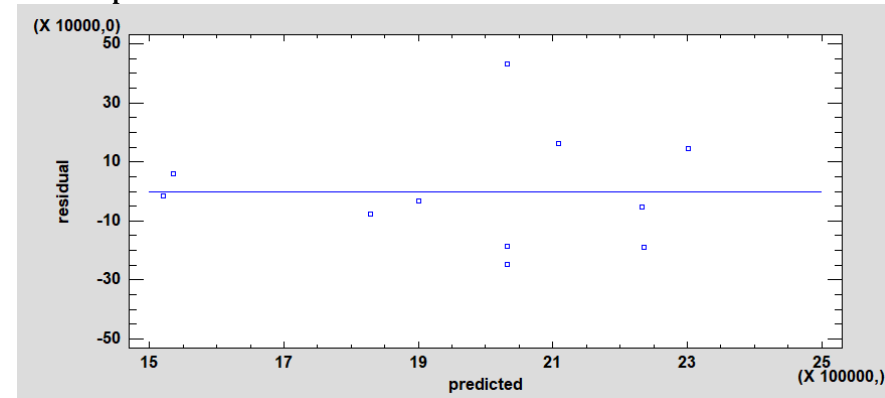

Optimum MW value = 2.316820 E6 g L<sup>-1</sup> for 101.9 mM ammonium acetate and 69.3 g L<sup>-1</sup> glucose

## Ammonium acetate - Mannitol : Molecular Weight (MW, g L<sup>-1</sup>)

### Analysis of Variance

| Source                          | Sum of Squares | Df | Mean Square | F-Ratio | P-Value |
|---------------------------------|----------------|----|-------------|---------|---------|
| A:Ammonium acetate (mM)         | 1.85772E12     | 1  | 1.85772E12  | 3.64    | 0.1146  |
| B:Mannitol (g L <sup>-1</sup> ) | 1.23221E12     | 1  | 1.23221E12  | 2.42    | 0.1808  |
| AA                              | 3.56979E11     | 1  | 3.56979E11  | 0.70    | 0.4410  |
| AB                              | 9.44333E10     | 1  | 9.44333E10  | 0.19    | 0.6849  |
| BB                              | 1.66016E12     | 1  | 1.66016E12  | 3.25    | 0.1311  |
| Total error                     | 2.5502E12      | 5  | 5.1004E11   |         |         |
| Total (corr.)                   | 7.44701E12     | 10 |             |         |         |

R-squared = 65.7553 percent

R-squared (adjusted for d.f.) = 31.5107 percent

Standard Error of Est. = 714171.

Mean absolute error = 395566.

Durbin-Watson statistic = 2.84748 (P=0.9935)

Lag 1 residual autocorrelation = -0.489777

### Regression coeffs.

| Coefficient                     | Estimate |
|---------------------------------|----------|
| constant                        | -30236.5 |
| A:Ammonium acetate (mM)         | 13211.8  |
| B:Mannitol (g L <sup>-1</sup> ) | 108013.  |
| AA                              | -157.14  |
| AB                              | -170.722 |
| BB                              | -1071.02 |

### Residual plot

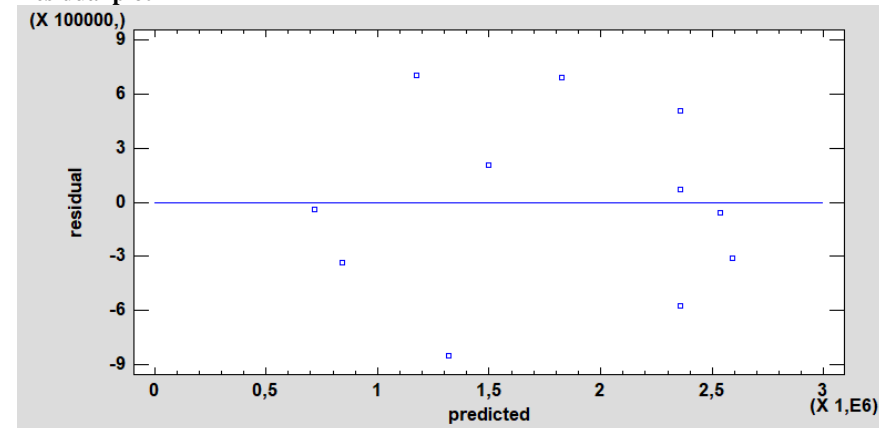

Optimum MW value = 2.72828 E6 g L<sup>-1</sup> for 15.3 mM ammonium acetate and 49.2 g L<sup>-1</sup> mannitol

## Ammonium acetate - Glucose : Yield (mg L-1)

### Analysis of Variance

| Source                  | Sum of Squares | Df | Mean Square | F-Ratio | P-Value |
|-------------------------|----------------|----|-------------|---------|---------|
| A:Ammonium acetate (mM) | 56330.0        | 1  | 56330.0     | 26.99   | 0.0035  |
| B:Glucose (g L-1)       | 13716.5        | 1  | 13716.5     | 6.57    | 0.0504  |
| AA                      | 4436.59        | 1  | 4436.59     | 2.13    | 0.2046  |
| AB                      | 28556.1        | 1  | 28556.1     | 13.68   | 0.0140  |
| BB                      | 121.881        | 1  | 121.881     | 0.06    | 0.8186  |
| Total error             | 10434.9        | 5  | 2086.97     |         |         |
| Total (corr.)           | 114501.        | 10 |             |         |         |

R-squared = 90.8867 percent

R-squared (adjusted for d.f.) = 81.7734 percent

Standard Error of Est. = 45.6834

Mean absolute error = 27.9143

Durbin-Watson statistic = 1.37764 (P=0.4130)

Lag 1 residual autocorrelation = 0.195928

### Regression coeffs.

| Coefficient             | Estimate   |
|-------------------------|------------|
| constant                | 229.89     |
| A:Ammonium acetate (mM) | 0.679476   |
| B:Glucose (g L-1)       | -4.48079   |
| AA                      | -0.0175184 |
| AB                      | 0.0938808  |
| BB                      | 0.00917682 |

### Residual plot

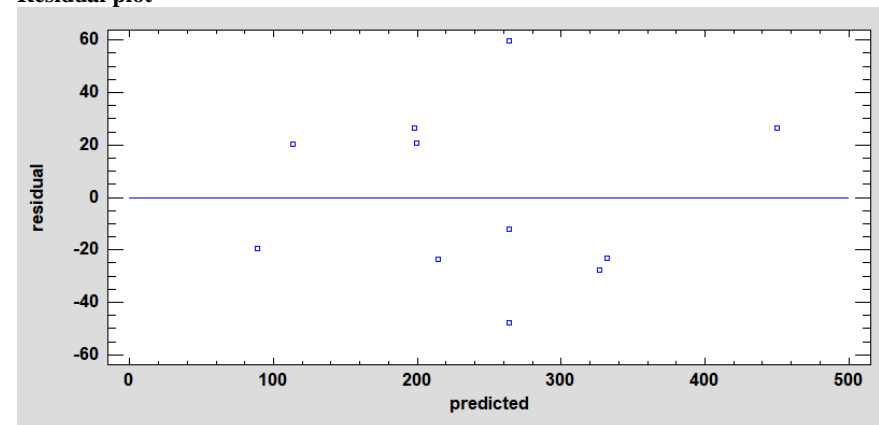

Optimum yield value = 563.1 g L-1 for 116.6 mM ammonium acetate and 69.3 g L<sup>-1</sup> glucose

## Ammonium acetate - Mannitol : Yield (mg L-1)

### Analysis of Variance

| Source                  | Sum of Squares | Df | Mean Square | F-Ratio | P-Value |
|-------------------------|----------------|----|-------------|---------|---------|
| A:Ammonium acetate (mM) | 49366.4        | 1  | 49366.4     | 8.15    | 0.0356  |
| B:Mannitol (g L-1)      | 12202.1        | 1  | 12202.1     | 2.02    | 0.2150  |
| AA                      | 3634.73        | 1  | 3634.73     | 0.60    | 0.4735  |
| AB                      | 503.161        | 1  | 503.161     | 0.08    | 0.7847  |
| BB                      | 2324.01        | 1  | 2324.01     | 0.38    | 0.5627  |
| Total error             | 30275.5        | 5  | 6055.1      |         |         |
| Total (corr.)           | 100742.        | 10 |             |         |         |

R-squared = 69.9475 percent

R-squared (adjusted for d.f.) = 39.895 percent

Standard Error of Est. = 77.8145

Mean absolute error = 45.9084

Durbin-Watson statistic = 1.39783 (P=0.4278)

Lag 1 residual autocorrelation = 0.228255

### Regression coeffs.

| Coefficient             | Estimate   |
|-------------------------|------------|
| constant                | 137.743    |
| A:Ammonium acetate (mM) | -0.406219  |
| B:Mannitol (g L-1)      | 0.521944   |
| AA                      | 0.0158563  |
| AB                      | 0.0124618  |
| BB                      | -0.0400722 |

### Residual plot

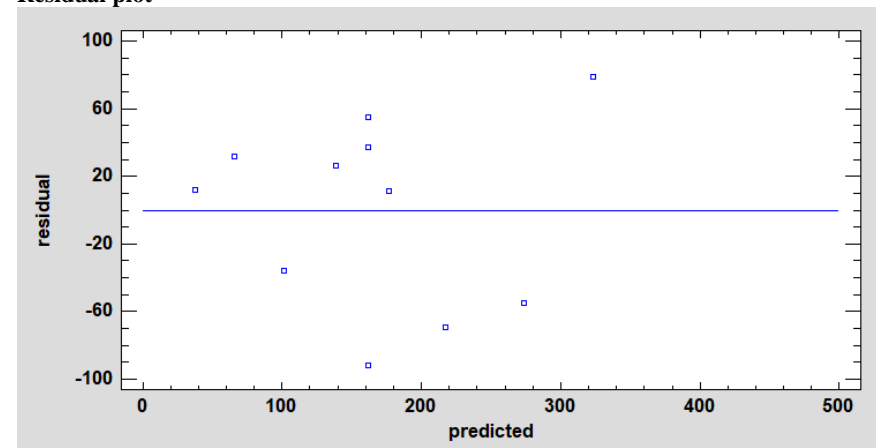

Optimum yield value = 330.2 g L-1 for 116.6 mM ammonium acetate and 24.6 g L<sup>-1</sup> mannitol
