# Supplementary material for: Influence of the Carbon and Nitrogen Sources on Diabolican Production by the Marine Vibrio diabolicus Strain CNCM I-1629
Source: MDPI journal article supplement (doi:10.3390/polym14101994), 2022-05-13

## Supplementary data S1 : Osidic composition of the EPS produced upon the CCD conditions

On culture medium of the CCD Ammonium acetate – Glucose

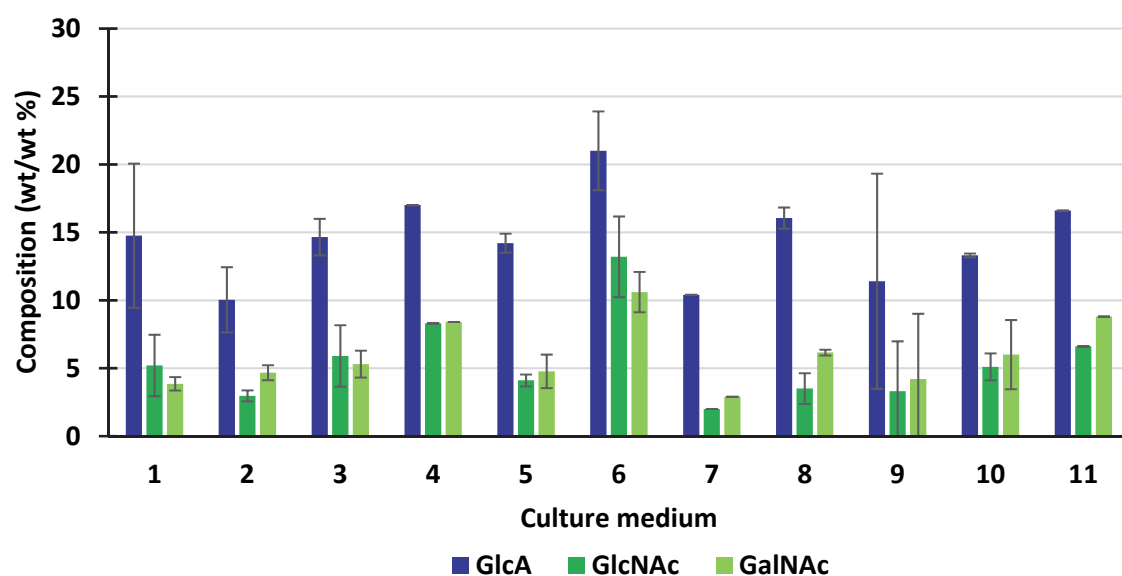

On culture medium of the CCD Ammonium acetate – Mannitol

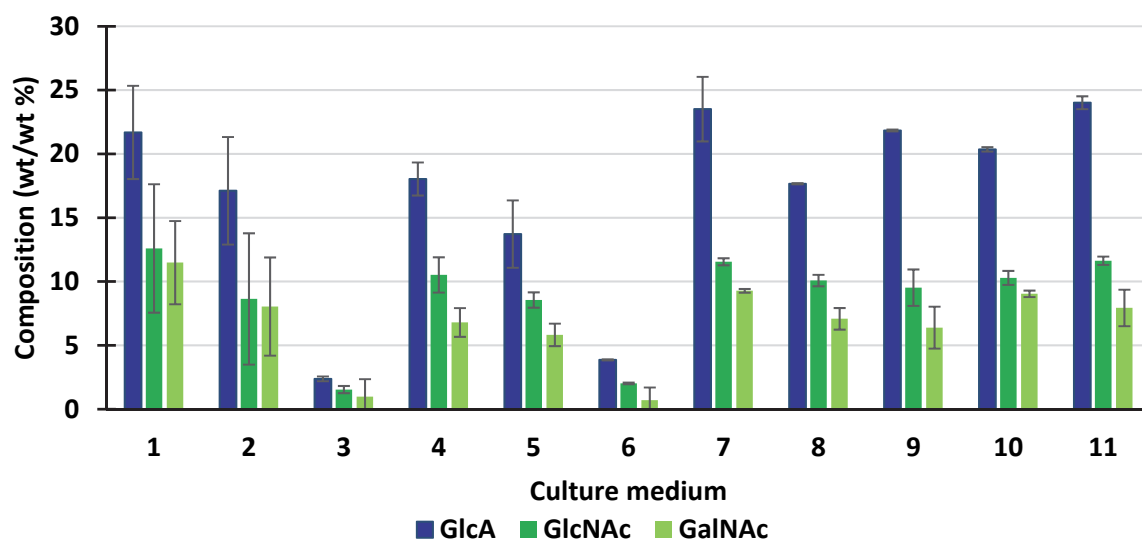

Supplement: s1 [file s1]
